# Supplementary material for: Association of COMT Polymorphisms with Multiple Physical Activity-Related Injuries among University Students in China
Source: MDPI journal article supplement (doi:10.3390/ijerph182010828), 2021-10-15
Supplement: s1 [file s1]

**Table S1.** Basic information of primers for the SNPs in COMT gene.

| SNPs     | 2nd_PCRP                           | 1st_PCRP                           | UEP_SEQ                     |
|----------|------------------------------------|------------------------------------|-----------------------------|
| rs9265   | ACGTTGGATGAGTAGAGAGCCTTTC<br>TCCAG | ACGTTGGATGACTGCCGAAGGTCA<br>GTCCC  | aAGCCCATGCTGGCTG            |
| rs4680   | ACGTTGGATGTTTTCCAGGTCTGAC<br>AACGG | ACGTTGGATGACCCAGCGGATGGT<br>GGATT  | GCACACCTTGTCTTC<br>A        |
| rs6269   | ACGTTGGATGTTGCTTGAGTGCCA<br>CCATC  | ACGTTGGATGCAAGGCTGGCATT<br>CTGAAC  | aATCGCCCCCTTGTGTT           |
| rs4818   | ACGTTGGATGCAGTCGGGGTTGATC<br>TCGAT | ACGTTGGATGACTGTGGCTACTCA<br>GCTGTG | ttGGTTGATCTCGATGG<br>TGAT   |
| rs4633   | ACGTTGGATGTCATGGGTGACACCA<br>AGGAG | ACGTTGGATGTAGGTGTCAATGGC<br>CTCCAG | aatGAGCAGCGCATCCT<br>GAACCA |
| rs165655 | ACGTTGGATGTTCCAAAGCTTCCTT<br>GCCCA | ACGTTGGATGTTCTAAAGGCGGAG<br>GGTCTC | aatgCCTTGCCCAGGGCT<br>G     |
| rs165656 | ACGTTGGATGGTGCTTTGAAGGTGA<br>GTTGG | ACGTTGGATGATGTGCTCAGCAGA<br>CCTGTG | ggcaAGGGTGGGTACAG<br>ATTCC  |
| rs165722 | ACGTTGGATGTGCTTCCCTGTTCTCT<br>TCTG | ACGTTGGATGAGGCAAGGAGGCA<br>GGCCTA  | ccTTCTCTTCTGCTCTGT<br>C     |

SNPs, single nucleotide polymorphisms; COMT, catechol-O-methyltransferase.

**Table S2.** Basic information of the eight SNPs within COMT gene.

| SNPs     | Location <sup>a</sup> | Allele Origin <sup>b</sup> | MAF <sup>c</sup> | P-value <sup>d</sup> |
|----------|-----------------------|----------------------------|------------------|----------------------|
| rs9265   | Chr22:19970108        | A/C                        | 0.494            | 0.355                |
| rs4680   | Chr22:19963748        | A/G                        | 0.287            | 0.347                |
| rs6269   | Chr22:19962429        | G/A                        | 0.323            | 0.839                |
| rs4818   | Chr22:19963684        | G/C                        | 0.317            | 0.544                |
| rs4633   | Chr22:19962712        | T/C                        | 0.256            | 0.804                |
| rs165655 | Chr22:19970240        | A/G                        | 0.457            | 0.272                |
| rs165656 | Chr22:19961340        | C/G                        | 0.250            | 0.621                |
| rs165722 | Chr22:19961490        | T/C                        | 0.244            | 0.917                |

<sup>a</sup>: Location given according to NCBI datasets; <sup>b</sup>: The nucleotide of each SNP shown in left represents the minor allele, as given in NCBI datasets; <sup>c</sup>: Data were calculated from our present dataset; <sup>d</sup>: P-value was calculated by  $\chi^2$  test for the Hardy-Weinberg equilibrium; SNPs, single nucleotide polymorphisms; COMT, catechol-O-methyltransferase; MAF, minor allele frequency.
